# Supplementary material for: ansa-Metallocenes with a Ph2Si bridge: molecular structures of HfCl2[Ph2Si(η5-C13H8)(η5-C5H4)] and HfCl2[Ph2Si(C13H9)(η5-C5H4)]2†
Source: Royal Society of Chemistry journal article supplement (doi:10.1039/b009280k), 2001-01-01
Supplement: b009280k.doc [file b009280k.doc]

*Supplementary Information*

***ansa*-Metallocenes with Ph2Si Bridge.
Molecular Structures of Ph2Si(5-fluorenyl)(5-C5H4)HfCl2 and
[(9-fluorenyl)Ph2SiC5H4-5]2HfCl2.**

Vyacheslav V. Izmer,*a* Anton Y. Agarkov,*a* Valentina M. Nosova,*b*
Lyudmila G. Kuz'mina,*c* Judith A. K. Howard,*d* Irina P. Beletskaya,*a* and
Alexander Z. Voskoboynikov **a*

**Characterization Data**

**Di(1*H*-inden-1-yl)(diphenyl)silane.** Anal. calc. for C30H24Si: C, 87.33; H, 5.86.
Found: C, 87.29; H, 5.80.

***Rac-* and *meso*-Ph2Si(5-indenyl)2HfCl2 (1** and **2).** *Rac*-complex **1**. Anal. calc. for C30H22Cl2HfSi: C, 54.60; H, 3.36. Found: C, 54.37; H, 3.22. 1H-NMR (CD2Cl2): ** 6.23 (d, *J*= 3.3 Hz, 2H, H(2, 2’)), 6.79 (ddd, *J*= 0.9 Hz, *J*= 6.6 Hz, *J*=8.9 Hz, 2H, H(7, 7’)), 6.88 (dd, *J*= 0.9 Hz, *J*= 3.3 Hz, 2H, H(3, 3’)), 6.75-7.65 (m, 12H, H(4, 4’, 5, 5’, 6, 6’, 12, 12’, 13, 13’, 14, 14’)), 8.11 (m, 2H, H(11, 11’, 15, 15’)). *Meso*-complex **2**. Anal. Found: C, 54.40; H, 3.28. 1H-NMR (CD2Cl2): ** 6.18 (d, *J*= 3.3 Hz, 2H, H(2, 2’)), 6.69 (ddd, *J*= 0.7 Hz, *J*= 6.7 Hz, *J*=8.8 Hz, 2H, H(7, 7’)), 6.87 (dd, *J*= 0.9 Hz, *J*= 3.2 Hz, 2H, H(3, 3’)), 7.05-7.65 (m, 12H, H(4, 4’, 5, 5’, 6, 6’, 12, 12’, 13, 13’, 14, 14’)), 8.11 (m, 2H, H(11, 15)), 8.22 (m, 2H, H(11’, 15’)). 13C{1H}-NMR: (CD2Cl2): ** 87.78 (C(1, 1’)), 117.76 (C(2, 2’)), 120.31 (C(3, 3’)), 125.68, 125.75, 127.00, 127.55, 128.58, 129.26, 129.35, 131.45, 131.72, 134.99, 135.22, 135.33, 135.38, 135.51.

**Chloro(fluoren-9-yl)diphenylsilane.** Anal. calc. for C25H19ClSi: C, 78.41; H, 5.00. Found: C, 78.69; H, 5.13. 1H-NMR (CDCl3): ** 4.57 (s, 1H, H(9) in Flu), 7.17 (dt, *J*= 1.2 Hz, *J*= 7.4 Hz, 2H, H(2, 7) in Flu), 7.25-7.45 (m, 14H, H(1, 3, 6, 8) in Flu, H(2-6) in Ph), 7.74 (d, *J*= 7.7 Hz, 2H, H(4, 5) in Flu). 13C{1H}-NMR: (CDCl3): ** 41.50 (C(9) in Flu), 119.88, 125.19, 126.22, 126.25, 127.86, 130.71, 131.15, 134.73, 141.24, 142.16.

**Cyclopentadienyl(fluoren-9-yl)diphenylsilane.** Anal. calc. for C30H24Si: C, 87.33; H, 5.86. Found: C, 87.44; H, 5.95. 1H-NMR (CDCl3): ** 4.01 (s, 1H, H(1) in Cp), 4.58 (s, 1H, H(9) in Flu), 6.42 (m, 2H, H(2, 5) in Cp), 6.52 (m, 2H, H(3, 4) in Cp), 7.10-7.35 (m, 16H, H(1-3, 6-8) in Flu, H(2-6) in Ph), 7.65 (d, *J*= 7.5 Hz, 2H, H(4, 5) in Flu). 13C{1H}-NMR: (CDCl3): ** 41.15 (C(1) in Cp), 46.64 (C(9) in Flu), 119.83, 124.79, 125.66, 125.99, 126.95, 129.63, 130.80, 132.21, 132.67, 135.29, 140.92, 143.94.

**Ph2Si(5-fluorenyl)(5-cyclopentadienyl)HfCl2 (3).** Anal. calc. for C30H22Cl2HfSi: C, 54.60; H, 3.36. Found: C, 54.68; H, 3.33. For full description of 1H- and 13C{1H}-NMR spectra see table 3.
